# Supplementary material for: Long-Term Impact of an Educational Antimicrobial Stewardship Program on Management of Patients with Hematological Diseases
Source: PubMed Central journal article supplement (PMC7911074; doi:10.3390/antibiotics10020136), 2021-01-30
Supplement: antibiotics-10-00136-s001.pdf [file antibiotics-10-00136-s001.pdf]

### Supplementary material

**Table S1.** Differences between the pre-intervention period and the antimicrobial stewardship program period regarding pre-post analysis of antimicrobial consumption.

| Outcomes                              | Pre-Intervention period | ASP period | P value |
|---------------------------------------|-------------------------|------------|---------|
| <b>Total J01+J02</b>                  | 148.2±16.2              | 112.0±21.7 | <0.001  |
| <b>Antibiotics (J01)</b>              | 107.5±9.3               | 71.2±11.7  | <0.001  |
| <b>Antifungals (J02)</b>              | 40.8±11.3               | 40.8±11.7  | 0.954   |
| <b>Carbapenems</b>                    | 11.7±2.0                | 7.1±3.2    | <0.001  |
| <b>Piperacillin-tazobactam</b>        | 6.9±1.6                 | 14.9±4.0   | <0.001  |
| <b>Antipseudomonal cephalosporins</b> | 15.9±3.3                | 6.9±4.0    | <0.001  |
| <b>Quinolones</b>                     | 34.8±4.6                | 10.9±4.8   | <0.001  |
| <b>Amikacin</b>                       | 5.1±0.8                 | 5.5±1.7    | 0.782   |
| <b>Glycopeptides</b>                  | 7.3±1.9                 | 4.9±2.4    | 0.009   |

Data are presented as mean±standard deviation of quarterly defined daily doses per 100 occupied bed days. P values represent the results from Student's t-test or Mann-Whitney U, according to the data distribution. ASP, antimicrobial stewardship program.

**Table S2.** Trend analysis of antimicrobial consumption (2009-2019).

| Outcomes                              | QPC (%) | 95% CI             | P value |
|---------------------------------------|---------|--------------------|---------|
| <b>Total J01+J02</b>                  | -1.455  | (-2.011 to -0.896) | <0.001  |
| <b>Antibiotics (J01)</b>              | -1.622  | (-1.925 to -1.317) | <0.001  |
| <b>Antifungals (J02)</b>              | -0.857  | (-1.813 to 0.108)  | 0.082   |
| <b>Carbapenems</b>                    | -2.787  | (-3.666 to -1.899) | <0.001  |
| <b>Piperacillin-tazobactam</b>        | 1.220   | (-0.201 to 2.662)  | 0.093   |
| <b>Antipseudomonal cephalosporins</b> | -1.301  | (-4.205 to 1.690)  | 0.390   |
| <b>Quinolones</b>                     | -4.381  | (-5.963 to -2.773) | <0.001  |
| <b>Amikacin</b>                       | -0.605  | (-1.911 to 0.718)  | 0.368   |
| <b>Glycopeptides</b>                  | -2.621  | (-3.614 to -1.618) | <0.001  |

Data are presented as quarterly defined daily doses per 100 occupied bed days. QPC, quarterly percentage change. CI, confidence interval.

**Table S3.** Frequency of most relevant gram-negative microorganisms and *Candida* spp. as causative agents of bloodstream infections (2009–2019).

| Microorganism                       | Number (%)<br>N = 522 |
|-------------------------------------|-----------------------|
| <b>Gram-negative microorganisms</b> | 493                   |
| <i>Escherichia coli</i>             | 273 (55.4)            |
| ESBL <i>E. coli</i>                 | 36 (13.2)             |
| <i>Klebsiella pneumoniae</i>        | 116 (23.5)            |
| ESBL <i>K. pneumoniae</i>           | 26 (22.4)             |
| <i>Pseudomonas aeruginosa</i>       | 82 (16.6)             |
| MDR <i>P. aeruginosa</i>            | 13 (15.9)             |
| <b><i>Candida</i> spp.</b>          | 29                    |

ESBL, extended-spectrum β-lactamase. MDR, multidrug-resistant.

**Table S4.** Mortality of patients with the most relevant gram-negative microorganisms and *Candida* spp. causing bloodstream infections (2009-2019).

| Microorganism                     | Number of patients | Number of deaths on day +7 (%) | Number of deaths on day +30 (%) |
|-----------------------------------|--------------------|--------------------------------|---------------------------------|
| <b>MDR microorganisms</b>         | 104                | 13 (12.5)                      | 29 (27.9)                       |
| ESBL <i>Escherichia coli</i>      | 36                 | 2 (5.6)                        | 6 (16.7)                        |
| ESBL <i>Klebsiella pneumoniae</i> | 26                 | 2 (7.7)                        | 4 (15.4)                        |
| MDR <i>Pseudomonas aeruginosa</i> | 13                 | 3 (23.1)                       | 6 (46.2)                        |
| <i>Candida</i> spp.               | 29                 | 6 (20.7)                       | 13 (44.8)                       |
| <b>Non-MDR microorganisms</b>     | 396                | 23 (5.8)                       | 56 (14.1)                       |
| <i>Escherichia coli</i>           | 237                | 13 (5.5)                       | 35 (14.8)                       |
| <i>Klebsiella pneumoniae</i>      | 90                 | 6 (6.7)                        | 13 (14.4)                       |
| <i>Pseudomonas aeruginosa</i>     | 69                 | 4 (5.8)                        | 8 (11.6)                        |

MDR, multidrug-resistant. ESBL, extended-spectrum  $\beta$ -lactamase.

**Table S5.** Differences between the pre-intervention period and the antimicrobial stewardship program period regarding pre-post analysis of incidence and mortality rate of multidrug-resistant bloodstream infections.

| Outcomes                 | Pre-Intervention period | ASP period      | P value |
|--------------------------|-------------------------|-----------------|---------|
| <b>Incidence density</b> | 1.11 $\pm$ 0.76         | 0.82 $\pm$ 0.61 | 0.210   |
| <b>Early mortality</b>   | 0.05 $\pm$ 0.16         | 0.12 $\pm$ 0.19 | 0.308   |
| <b>Late mortality</b>    | 0.15 $\pm$ 0.32         | 0.26 $\pm$ 0.27 | 0.226   |

Data are presented as mean $\pm$ standard deviation of quarterly incidence density and all-cause crude death rate on day +7 (early mortality) and +30 (late mortality) per 1000 occupied bed days. P values represent the results from Student's t-test or Mann-Whitney U, according to the data distribution. ASP, antimicrobial stewardship program.

**Table S6.** Trend analysis of the incidence and mortality rate of multidrug-resistant bloodstream infections (2009-2019).

| Outcomes                 | QPC (%) | 95% CI            | P value |
|--------------------------|---------|-------------------|---------|
| <b>Incidence density</b> | -0.325  | (-2.049 to 1.431) | 0.709   |
| <b>Early mortality</b>   | -0.697  | (-1.657 to 0.272) | 0.154   |
| <b>Late mortality</b>    | -0.608  | (-1.545 to 0.337) | 0.201   |

Data are presented as quarterly incidence density and all-cause crude death rate on day +7 (early mortality) and +30 (late mortality) per 1000 occupied bed days. QPC, quarterly percentage change. CI, confidence interval.

# PRIOAM CORE INTERVENTIONS

## 5 STEPS FOR ANTIMICROBIAL STEWARDSHIP

**01 LOCAL GUIDELINES**  
Consensual and updated clinical guidelines for common infectious syndromes

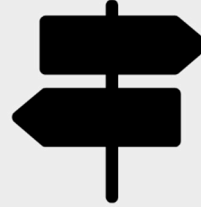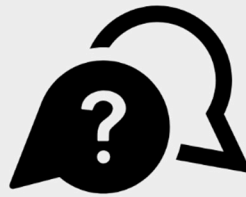

**02 EDUCATIONAL INTERVIEWS**  
Face-to-face structured interviews with prescribers about antimicrobial therapy of the case

**03 CLINICAL SESSIONS**  
Regular clinical sessions tackling practical aspects of common infections

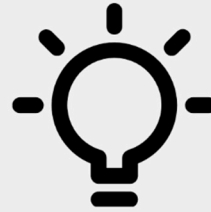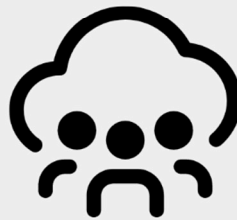

**04 INSTITUTIONAL SUPPORT**  
Incorporation of the ASP objectives into the annual agreement signed by the hospital director

**05 REGULAR FEEDBACK**  
Quarterly reports to departments on evaluation of annual goals

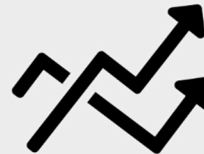

Figure S1. Description of the core elements of PRIOAM.

Date of interview: Centre  
 Clinical department Episode number  
 Advisor: Prescriber  
 Antimicrobial agent(s)  
 Clinical indication:  
 Perioperative prophylaxis  
 Diagnosis without microbiological confirmation  
 Diagnosis with microbiological confirmation  
 Describe

**Perioperative prophylaxis**

1. Was prophylaxis indicated?  Yes  No  
 2. Was the chosen agent appropriate?  Yes  No  
 3. Was the administration timing appropriate?  Yes  No  
 4. Was the total number of doses appropriate?  Yes  No

**Empirical antimicrobial treatment**

1. Was empirical treatment initiation indicated?  Yes  No  
 2. Was the timing of treatment initiation appropriate?  Yes  No  
 3. Were microbiological samples collected?  
 It was not indicated:  
 Not performed  
 It was indicated:  
 Performed  
 Not performed or incorrectly performed  
 4. Was the chosen agent appropriate?  Yes  No  
 5. Was the dosing appropriate?  Yes  No  
 6. Was the way of administration appropriate?  Yes  No  
 7. If other therapeutic measures were indicated, were they performed correctly?  
 They were not indicated and not performed   
 They were indicated and correctly performed   
 They were indicated, but not correctly performed   
 8. Is the planned treatment duration appropriate?  Yes  No

**Targeted antimicrobial treatment**

1. Was antimicrobial treatment indicated?  Yes  No  
 2. Was the timing of the treatment initiation appropriate?  Yes  No  
 3. Was the interpretation of the microbiological results correct?  Yes  No  
 4. Was the chosen agent appropriate?  Yes  No  
 5. Was the chosen agent the most appropriate?  Yes  No  
 6. Was the dosing appropriate?  Yes  No  
 7. Was the way of administration appropriate?  Yes  No  
 8. If other therapeutic measures were indicated, were they performed correctly?  
 They were not indicated and not performed   
 They were indicated and correctly performed   
 They were indicated, but not correctly performed   
 1. Is the planned treatment duration appropriate?  Yes  No

Figure S2. Form for PRIOAM educational interviews.
